# Supplementary material for: Transcriptomic Analysis of Steinernema Nematodes Highlights Metabolic Costs Associated to Xenorhabdus Endosymbiont Association and Rearing Conditions
Source: Frontiers journal article supplement (doi:10.3389/fphys.2022.821845), 2022-02-25
Supplement: Data_Sheet_1.ZIP [file Data_Sheet_1.ZIP]

## Sheet: Sheet1
Detail on transcripts					differential expression tests												raw-data (transcript count)
ID	coding protein	Annotation	homologous reference		results (VV/VA)		In vivo vs in vitro colonized (VV)					In vivo vs in vitro aposymbiotic (VA)					in vivo		in vitro colonized		in vitro aposymbiotic
							cuffdiff log2	edgeR logFC	cuffdiff p-value	edgeR p-value		cuffdiff log2	edgeR logFC	cuffdiff p-value	edgeR p-value		line1	line2	line1	line2	line1	line2
TRINITY_DN1043_c0_g1_i1	TRINITY_DN1043_c0_g1_i1.g52022	Domain of unknown function DUF148	TKR95482.1		D/D		-0.818346	-0.740788	5e-05	9.73e-08		-0.452719	-0.459566	0.0007	0.000409975		142.051	153.448	100.927	114.697	86.4917	78.4802
TRINITY_DN108_c0_g1_i37	TRINITY_DN108_c0_g1_i37.g14914	Myosin head (motor domain)	TKR70123.1		D/D		-2.51029	-2.41288	5e-05	0		-0.735241	-0.740779	5e-05	5.18e-222		4893.2	4858.69	2948.58	2908.84	860.552	848.673
TRINITY_DN11752_c0_g1_i1	TRINITY_DN11752_c0_g1_i1.g9171	Trypsin	TKR70075.1		D/D		-3.22927	-3.10229	0.0033	7.64e-11		-2.17588	-2.16148	0.0022	6.27e-08		27.2012	30.9847	5.42617	7.43407	1.24448	4.86699
TRINITY_DN1269_c0_g1_i1	TRINITY_DN1269_c0_g1_i1.g27876	Lytic transglycolase	TKR67116.1		D/D		-0.92074	-0.832413	5e-05	2.53e-111		-1.4894	-1.49557	5e-05	4.95e-313		2091.47	2148.27	741.215	767.833	1125.01	1097.51
TRINITY_DN15023_c0_g1_i1	TRINITY_DN15023_c0_g1_i1.g31924	TILa domain	TKR67260.1		D/D		-0.642679	-0.568582	5e-05	7.79e-10		-0.999263	-1.00621	5e-05	8.29e-25		305.258	320.175	157.359	155.053	189.784	203.805
TRINITY_DN15427_c0_g1_i2	TRINITY_DN15427_c0_g1_i2.g29489	hypothetical protein	TKR94562.1		D/D		-0.592003	NS	0.0117	NS		-1.11136	-1.11449	0.0002	4.7e-06		52.8913	51.6411	24.9604	23.3642	36.7123	31.6354
TRINITY_DN1911_c0_g1_i1	TRINITY_DN1911_c0_g1_i1.g44261	putative OV39 antigen	TMS34207.1		D/D		-0.788601	-0.6955	5e-05	9.56e-08		-0.585621	-0.59104	5e-05	2.56e-06		172.274	156.399	106.353	112.573	88.9807	100.382
TRINITY_DN21515_c0_g1_i1	TRINITY_DN21515_c0_g1_i1.g6849	hypothetical protein	TKR95840.1		D/D		-0.545114	-0.489168	0.0001	0.000857828		-1.24955	-1.25669	5e-05	6.36e-15		143.562	128.365	70.5402	43.5424	85.8694	94.9063
TRINITY_DN25432_c1_g1_i1	TRINITY_DN25432_c1_g1_i1.g5218	hypothetical protein	TKR73723.1		D/D		-1.85656	-1.76659	5e-05	0		-1.53346	NS	5e-05	NS		32905.9	32291.9	11251.7	11258.4	8881.89	9005.15
TRINITY_DN25822_c0_g1_i1	TRINITY_DN25822_c0_g1_i1.g1837	Eukaryotic aspartyl protease	TKR94920.1		D/D		-0.359009	NS	0.00015	NS		-0.518522	-0.524484	5e-05	2.12e-07		244.811	252.304	176.893	169.922	203.473	181.295
TRINITY_DN3248_c2_g1_i1	TRINITY_DN3248_c2_g1_i1.g50548	hypothetical protein	TKR73721.1		D/D		-3.04622	-3.1709	5e-05	2.82e-112		-1.6322	-1.66478	5e-05	1.05e-54		321.881	333.454	108.523	98.7669	35.4678	32.2438
TRINITY_DN4328_c0_g1_i1	TRINITY_DN4328_c0_g1_i1.g42208	Papain family cysteine protease	TKR58726.1		D/D		-0.393162	-0.304659	5e-05	5.38e-09		-0.430699	-0.436967	5e-05	6.06e-17		1949.42	1863.51	1486.77	1340.26	1435.51	1446.1
TRINITY_DN4982_c1_g1_i1	TRINITY_DN4982_c1_g1_i1.g50051	Carboxylesterase family	TKR92379.1		D/D		-1.95913	-1.86463	5e-05	2.29e-31		-0.751495	-0.75679	5e-05	6.04e-09		167.741	159.35	92.2449	101.953	41.6902	41.9778
TRINITY_DN592_c2_g1_i1	TRINITY_DN592_c2_g1_i1.g8544	Lectin C-type domain	TKR83292.1		D/D		-3.29602	-3.17978	0.00135	5.29e-17		-3.49973	-3.46851	0.0007	4e-19		45.3354	51.6411	3.2557	5.31005	1.86673	7.90886
TRINITY_DN69_c0_g1_i1	TRINITY_DN69_c0_g1_i1.g18233	hypothetical protein	TKR73544.1		D/D		-0.823508	-0.748701	5e-05	2.41e-176		-0.779346	-0.786784	5e-05	3.23e-199		4888.67	4976.73	2905.17	2834.5	2775.82	2704.83
TRINITY_DN7042_c0_g1_i1	TRINITY_DN7042_c0_g1_i1.g23548	hypothetical protein	TKR89775.1		D/D		-1.32607	-1.23722	0.0001	1.14e-06		-0.88789	-0.891683	0.00075	0.000153319		48.3577	59.0184	29.3013	28.6743	18.045	24.335
TRINITY_DN716_c0_g1_i1	TRINITY_DN716_c0_g1_i1.g39516	Domain of unknown function (DUF3597)	TKR71881.1		D/D		-2.07511	-1.98033	5e-05	0		-1.03669	-1.04246	5e-05	0		18258.1	18443.2	8821.87	9063.19	4356.32	4326.15
TRINITY_DN845_c0_g1_i4	TRINITY_DN845_c0_g1_i4.g31277	Ubiquitin family	TKR72806.1		D/D		-0.436207	-0.364013	5e-05	5.25e-08		-0.479278	-0.486822	5e-05	4.43e-13		542.513	563.626	395.025	397.192	400.724	401.527
TRINITY_DN8876_c0_g3_i1	TRINITY_DN8876_c0_g3_i1.g42913	Papain family cysteine protease	TKR69433.1		D/D		-1.23375	-1.14401	5e-05	5.42e-22		-0.664504	-0.670334	5e-05	4.19e-10		243.3	221.319	141.08	151.867	92.0919	104.032
TRINITY_DN9387_c0_g1_i1	TRINITY_DN9387_c0_g1_i1.g7725	ATP synthase alpha/beta family, nucleotide-binding domain	TMS37092.1		D/D		-0.362728	-0.269808	5e-05	3.32e-05		-0.418344	-0.42418	5e-05	7.63e-11		607.494	612.316	453.628	458.788	500.283	444.113
TRINITY_DN9602_c0_g1_i1	TRINITY_DN9602_c0_g1_i1.g37267	hypothetical protein	TKR73721.1		D/D		-1.11267	-1.04145	5e-05	1.42e-138		-1.22645	-1.23418	5e-05	1.63e-192		3011.78	3173.71	1343.52	1295.65	1394.45	1410.82
TRINITY_DN1165_c0_g1_i3	TRINITY_DN1165_c0_g1_i3.g4094	Lipocalin / cytosolic fatty-acid binding protein family	TKR86737.1		D/NS		NS	NS	NS	NS		-0.594217	-0.600602	0.0019	0.000705191		81.6037	84.1012	59.6879	49.9145	65.3354	73.0049
TRINITY_DN1429_c0_g2_i1	TRINITY_DN1429_c0_g2_i1.g37754	Trypsin Inhibitor like cysteine rich domain	TKR89832.1		D/NS		NS	NS	NS	NS		-0.702945	NS	0.0029	NS		52.8913	69.3466	31.4718	43.5424	52.2684	56.5788
TRINITY_DN172_c0_g1_i1	TRINITY_DN172_c0_g1_i1.g14373	hypothetical protein	TKR73466.1		D/NS		NS	NS	NS	NS		-1.09597	-1.1042	5e-05	3.48e-80		941.465	889.702	442.775	412.06	928.386	918.645
TRINITY_DN200_c0_g1_i4	TRINITY_DN200_c0_g1_i4.g48405	Actin	TMS37116.1		D/NS		NS	NS	NS	NS		-0.816876	-0.822322	5e-05	1.34e-09		166.23	144.595	100.927	75.4027	146.227	155.135
TRINITY_DN20518_c0_g1_i1	TRINITY_DN20518_c0_g1_i1.g19459	Organic Anion Transporter Polypeptide (OATP)	TKR77996.1		D/NS		NS	NS	NS	NS		-0.704638	-0.710584	0.0001	6.72e-05		78.5813	101.807	54.2617	56.2865	75.9136	87.6058
TRINITY_DN2203_c0_g3_i1	TRINITY_DN2203_c0_g3_i1.g22707	Trypsin Inhibitor like cysteine rich domain	TKR89572.1		D/NS		NS	NS	NS	NS		-0.408017	NS	0.00855	NS		105.783	109.184	68.3697	93.4568	91.4696	80.3054
TRINITY_DN22438_c0_g1_i1	TRINITY_DN22438_c0_g1_i1.g24168	hypothetical protein	TKR95782.1		D/NS		NS	NS	NS	NS		-0.730753	-0.737339	5e-05	5.37e-07		122.406	131.316	86.8187	65.8446	123.826	141.751
TRINITY_DN2266_c2_g1_i1	TRINITY_DN2266_c2_g1_i1.g23202	Nematode fatty acid retinoid binding protein (Gp-FAR-1)	TKR67091.1		D/NS		NS	NS	NS	NS		-2.23308	-2.22062	0.00125	3.14e-09		31.7348	33.9356	6.5114	7.43407	26.1342	31.0271
TRINITY_DN231_c4_g1_i1	TRINITY_DN231_c4_g1_i1.g49679	hypothetical protein	TKR73466.1		D/NS		NS	NS	NS	NS		-0.562768	-0.571031	5e-05	5.48e-31		1860.26	1707.11	1210.04	1200.07	1709.92	1667.55
TRINITY_DN25873_c0_g1_i1	TRINITY_DN25873_c0_g1_i1.g1844	Glycosyl hydrolases family 31	TKR69511.1		D/NS		NS	NS	NS	NS		-0.759558	NS	0.01425	NS		37.7795	29.5092	20.6194	19.1162	24.2675	24.9433
TRINITY_DN40119_c0_g1_i1	TRINITY_DN40119_c0_g1_i1.g19464	Tissue inhibitor of metalloproteinase	TKR76613.1		D/NS		NS	NS	NS	NS		-0.43718	NS	0.01385	NS		89.1596	82.6258	61.8583	64.7826	84.625	89.431
TRINITY_DN4229_c0_g1_i1	TRINITY_DN4229_c0_g1_i1.g26204	hypothetical protein	TMS36329.1		D/NS		NS	NS	NS	NS		-0.450136	-0.456438	0.0014	0.000735697		136.006	140.169	107.438	94.5189	150.583	133.234
TRINITY_DN735_c0_g1_i1	TRINITY_DN735_c0_g1_i1.g40100	Nematode fatty acid retinoid binding protein (Gp-FAR-1)	TKR66991.1		D/NS		NS	NS	NS	NS		-0.723278	-0.730592	5e-05	5.62e-70		1703.1	1639.24	975.625	1046.08	1496.49	1485.04
TRINITY_DN751_c0_g1_i1	TRINITY_DN751_c0_g1_i1.g39064	Nematode fatty acid retinoid binding protein (Gp-FAR-1)	TKR66990.1		D/NS		NS	NS	NS	NS		-0.431903	-0.439241	5e-05	1.25e-10		1091.07	1236.44	869.272	853.856	1083.95	1151.04
TRINITY_DN10198_c0_g1_i1	TRINITY_DN10198_c0_g1_i1.g12374	Nucleoside diphosphate kinase	TKR93967.1		D/U		0.307011	0.381679	5e-05	4.08e-13		-0.273239	-0.280637	5e-05	1.3e-06		670.964	724.451	579.515	573.485	838.16	859.024
TRINITY_DN14815_c1_g1_i1	TRINITY_DN14815_c1_g1_i1.g46281	hypothetical protein	TKR81832.1		D/U		0.206212	0.282234	5e-05	5.73e-47		-0.873971	-0.881297	5e-05	0		6185.26	6151.19	3356.63	3365.51	7068.67	6935.46
TRINITY_DN14902_c1_g1_i1	TRINITY_DN14902_c1_g1_i1.g52179	Fatty acid-binding-like protein	TKR80884.1		D/U		1.03786	1.13202	5e-05	0		-0.500649	-0.506447	5e-05	8.25e-75		3288.33	3198.8	2333.25	2250.4	6572.75	6699.41
TRINITY_DN1926_c0_g1_i1	TRINITY_DN1926_c0_g1_i1.g44207	Glutathione peroxidase	TMS36415.1		D/U		1.15835	1.23717	5e-05	2.58e-11		-0.924351	-0.92752	0.00195	0.000458246		37.7795	50.1656	29.3013	16.9922	99.5588	94.298
TRINITY_DN200_c0_g1_i14	TRINITY_DN200_c0_g1_i14.g48411	Actin	TMS37116.1		D/U		0.825788	0.905278	0.0009	0.000211032		-1.05233	-1.05341	0.002	0.00116822		46.8466	22.1319	14.108	19.1162	68.4467	52.3202
TRINITY_DN200_c0_g1_i6	TRINITY_DN200_c0_g1_i6.g48410	Actin	TMS37116.1		D/U		0.867797	0.953806	5e-05	3.69e-06		-0.728213	NS	0.00275	NS		39.2907	70.8221	27.1309	39.2944	100.803	98.5566
TRINITY_DN20493_c0_g1_i1	TRINITY_DN20493_c0_g1_i1.g19443	Cysteine-rich secretory protein family	TKR62211.1		D/U		2.07889	2.1584	5e-05	0		-0.241032	NS	0.00325	NS		338.504	354.11	308.206	277.185	1437.38	1449.76
TRINITY_DN231_c0_g1_i1	TRINITY_DN231_c0_g1_i1.g49678	hypothetical protein	TKR73549.1		D/U		1.12588	1.16778	5e-05	1.89e-305		-1.10101	-1.11114	5e-05	4.71e-131		1382.73	1434.15	661.993	646.764	2949.43	2958.52
TRINITY_DN36259_c0_g1_i1	TRINITY_DN36259_c0_g1_i1.g2319	hypothetical protein	TKR73723.1		D/U		1.82454	1.9159	5e-05	0		-0.688681	-0.694698	5e-05	1.35e-116		3037.47	2894.85	1837.3	1841.52	10462.4	10434.8
TRINITY_DN36259_c0_g1_i2	TRINITY_DN36259_c0_g1_i2.g2320	hypothetical protein	TKR73723.1		D/U		1.98092	2.06546	5e-05	1.5e-25		-2.05857	-2.04369	0.00385	4.47e-07		28.7124	25.0828	7.59664	5.31005	102.67	108.291
TRINITY_DN385_c0_g1_i1	TRINITY_DN385_c0_g1_i1.g627	hypothetical protein	TKR73549.1		D/U		1.37267	1.43513	5e-05	5.06e-157		-0.237588	-0.245954	0.0007	0.000564479		454.865	458.868	406.963	366.393	1142.44	1164.43
TRINITY_DN6840_c3_g1_i1	TRINITY_DN6840_c3_g1_i1.g12967	Trypsin Inhibitor like cysteine rich domain	TKR89756.1		D/U		0.671298	0.736712	5e-05	2.42e-07		-1.21095	-1.21651	5e-05	3.22e-10		95.2043	81.1503	29.3013	46.7284	141.249	133.234
TRINITY_DN9500_c0_g1_i1	TRINITY_DN9500_c0_g1_i1.g22678	Prolyl-tRNA synthetase, C-terminal	TKR96053.1		D/U		0.366625	0.457377	0.00025	1.57e-06		-0.340485	NS	0.00155	NS		213.076	202.138	180.149	147.619	270.675	261.601
TRINITY_DN9969_c1_g1_i1	TRINITY_DN9969_c1_g1_i1.g9254	Ubiquitin family	TKR68314.1		D/U		0.729388	0.822534	5e-05	2.53e-254		-0.374777	-0.380662	5e-05	3.32e-39		3048.05	2962.72	2352.79	2281.2	4994.12	4929.05
TRINITY_DN138_c1_g1_i1	TRINITY_DN138_c1_g1_i1.g14951	Hint module	TMS35043.1		NS/D		-2.02557	-1.92078	0.00725	2.25e-05		NS	NS	NS	NS		21.1565	22.1319	33.6423	35.0463	6.84467	3.65024
TRINITY_DN1456_c0_g1_i1	TRINITY_DN1456_c0_g1_i1.g37594	Ubiquitin family	TKR61278.1		NS/D		-1.77979	-1.69042	5e-05	6.3e-18		NS	NS	NS	NS		102.76	101.807	120.461	122.131	26.7564	32.2438
TRINITY_DN15739_c0_g1_i1	TRINITY_DN15739_c0_g1_i1.g35478	Transforming acidic coiled-coil-containing protein (TACC), C-terminal	TKR88066.1		NS/D		-0.295185	NS	0.0005	NS		NS	NS	NS	NS		311.303	364.439	351.616	394.006	268.186	277.419
TRINITY_DN15891_c0_g1_i1	TRINITY_DN15891_c0_g1_i1.g19387	Calcineurin-like phosphoesterase	TKR62171.1		NS/D		-1.26928	NS	0.0084	NS		NS	NS	NS	NS		22.6677	16.2301	30.3866	32.9223	8.71139	7.30049
TRINITY_DN1641_c0_g1_i2	TRINITY_DN1641_c0_g1_i2.g11839	Trypsin Inhibitor like cysteine rich domain	TKR89767.1		NS/D		-0.594148	NS	0.004	NS		NS	NS	NS	NS		77.0701	64.9202	61.8583	47.7904	54.7573	37.7192
TRINITY_DN1652_c1_g3_i1	TRINITY_DN1652_c1_g3_i1.g11779	von Willebrand factor type A domain	TKR59414.1		NS/D		-2.75553	-2.62744	0.0043	6.19e-09		NS	NS	NS	NS		22.6677	35.411	31.4718	37.1703	2.48897	6.08374
TRINITY_DN16_c0_g1_i26	TRINITY_DN16_c0_g1_i26.g17964	Ubiquitin family	TKR80384.1		NS/D		-1.09843	-1.00611	0.00015	5.92e-05		NS	NS	NS	NS		68.0031	47.2147	61.8583	71.1546	22.4007	31.0271
TRINITY_DN16_c0_g1_i4	TRINITY_DN16_c0_g1_i4.g17971	Ubiquitin family	TKR67164.1		NS/D		-0.908881	-0.828093	5e-05	6.08e-08		NS	NS	NS	NS		146.584	118.037	161.7	128.503	69.0689	69.963
TRINITY_DN30737_c0_g1_i1	TRINITY_DN30737_c0_g1_i1.g26074	Collagen triple helix repeat (20 copies)	TKR81747.1		NS/D		-3.29523	-3.18076	5e-05	2.19e-29		NS	NS	NS	NS		86.1372	76.7239	95.5006	91.3328	5.60018	10.9507
TRINITY_DN3296_c2_g1_i1	TRINITY_DN3296_c2_g1_i1.g50464	Glycosyl hydrolase family 20, catalytic domain	TKR79981.1		NS/D		-0.340118	-0.245838	5e-05	1.12e-06		NS	NS	NS	NS		936.931	928.064	965.858	975.987	716.201	751.95
TRINITY_DN4079_c0_g1_i1	TRINITY_DN4079_c0_g1_i1.g53264	Protein kinase domain-containing protein	TKR70405.1		NS/D		-0.688716	-0.602182	0.00075	0.00135353		NS	NS	NS	NS		74.0478	78.1994	69.455	77.5267	47.9127	45.628
TRINITY_DN4343_c0_g1_i2	TRINITY_DN4343_c0_g1_i2.g42424	Alpha amylase, catalytic domain	TKR75722.1		NS/D		-1.61042	-1.50797	0.0002	3.88e-06		NS	NS	NS	NS		46.8466	32.4601	36.898	46.7284	14.3116	11.5591
TRINITY_DN491_c0_g1_i1	TRINITY_DN491_c0_g1_i1.g22041	Common central domain of tyrosinase	TKR94012.1		NS/D		-0.724431	-0.629025	5e-05	4.98e-07		NS	NS	NS	NS		184.364	209.515	228.984	185.852	126.937	110.724
TRINITY_DN557_c1_g1_i19	TRINITY_DN557_c1_g1_i19.g8160	hypothetical protein	TKR68514.1		NS/D		-4.38695	-4.25849	0.00015	6.76e-40		NS	NS	NS	NS		93.6931	87.0521	108.523	92.3948	3.11121	5.47537
TRINITY_DN6757_c0_g2_i5	TRINITY_DN6757_c0_g2_i5.g33396	Lectin C-type domain	TKR58232.1		NS/D		-0.438385	-0.341131	5e-05	0.00031788		NS	NS	NS	NS		282.591	274.436	264.797	262.316	208.451	201.98
TRINITY_DN776_c0_g2_i1	TRINITY_DN776_c0_g2_i1.g40089	Calcineurin-like phosphoesterase	TKR70396.1		NS/D		-1.0038	-0.912894	5e-05	2.48e-26		NS	NS	NS	NS		781.28	663.957	695.635	657.384	366.501	349.815
TRINITY_DN845_c0_g1_i35	TRINITY_DN845_c0_g1_i35.g31276	Ubiquitin family	TKR87802.1		NS/D		-0.301463	-0.230477	5e-05	0.00307112		NS	NS	NS	NS		382.328	410.178	402.622	399.316	311.743	318.788
TRINITY_DN938_c2_g1_i3	TRINITY_DN938_c2_g1_i3.g33839	PAN domain	TMS32182.1		NS/D		NS	-2.62383	NS	8.1e-12		NS	NS	NS	NS		33.2459	41.3129	32.557	35.0463	6.22242	4.86699
TRINITY_DN9997_c0_g1_i1	TRINITY_DN9997_c0_g1_i1.g9256	Glycosyl hydrolases family 31	TKR69511.1		NS/D		-1.04477	-0.947295	0.0001	6.76e-05		NS	NS	NS	NS		52.8913	61.9693	54.2617	54.1625	32.9788	22.5098
TRINITY_DN10176_c0_g1_i1	TRINITY_DN10176_c0_g1_i1.g12390	hypothetical protein	TMS39444.1		NS/NS		NS	NS	NS	NS		NS	NS	NS	NS		202.498	168.202	213.791	203.906	189.162	198.938
TRINITY_DN16_c0_g1_i34	TRINITY_DN16_c0_g1_i34.g17967	Ubiquitin family	TKR67164.1		NS/NS		NS	NS	NS	NS		NS	NS	NS	NS		27.2012	28.0337	29.3013	19.1162	23.023	17.0345
TRINITY_DN16_c0_g1_i8	TRINITY_DN16_c0_g1_i8.g17958	Ubiquitin family	TKR67164.1		NS/NS		NS	NS	NS	NS		NS	NS	NS	NS		92.1819	91.4785	108.523	124.255	117.604	94.298
TRINITY_DN26159_c0_g1_i1	TRINITY_DN26159_c0_g1_i1.g47365	Nematode fatty acid retinoid binding protein (Gp-FAR-1)	TKR67106.1		NS/NS		NS	NS	NS	NS		NS	NS	NS	NS		84.626	82.6258	91.1597	91.3328	70.3134	66.9211
TRINITY_DN27674_c0_g1_i1	TRINITY_DN27674_c0_g1_i1.g49723	CUB domain	TKR60430.1		NS/NS		NS	NS	NS	NS		NS	NS	NS	NS		27.2012	19.181	35.8127	32.9223	24.2675	27.9852
TRINITY_DN3260_c0_g1_i1	TRINITY_DN3260_c0_g1_i1.g50270	Kunitz/Bovine pancreatic trypsin inhibitor domain	TMS38341.1		NS/NS		NS	NS	NS	NS		NS	NS	NS	NS		197.964	181.482	185.575	182.666	214.051	219.623
TRINITY_DN32701_c0_g1_i1	TRINITY_DN32701_c0_g1_i1.g26757	putative Cystatin-like domain	TKR61470.1		NS/NS		NS	NS	NS	NS		NS	NS	NS	NS		16.623	29.5092	21.7047	27.6123	18.6673	20.6847
TRINITY_DN4037_c0_g1_i1	TRINITY_DN4037_c0_g1_i1.g53138	Lytic transglycolase	TKR67117.1		NS/NS		NS	NS	NS	NS		NS	NS	NS	NS		19.6453	17.7055	35.8127	26.5502	15.5561	21.9015
TRINITY_DN4230_c0_g1_i3	TRINITY_DN4230_c0_g1_i3.g26236	Serine carboxypeptidase	TKR81558.1		NS/NS		NS	NS	NS	NS		NS	NS	NS	NS		21.1565	20.6564	18.449	13.8061	28.6231	37.1108
TRINITY_DN4565_c0_g1_i2	TRINITY_DN4565_c0_g1_i2.g40416	Eukaryotic aspartyl protease	TKR71790.1		NS/NS		NS	NS	NS	NS		NS	NS	NS	NS		98.2267	87.0521	102.012	99.8289	97.6921	113.766
TRINITY_DN4749_c1_g1_i2	TRINITY_DN4749_c1_g1_i2.g25634	Trypsin Inhibitor like cysteine rich domain	TKR89883.1		NS/NS		NS	NS	NS	NS		NS	NS	NS	NS		93.6931	88.5276	111.779	88.1468	90.8474	72.3965
TRINITY_DN4864_c0_g1_i2	TRINITY_DN4864_c0_g1_i2.g47904	hypothetical protein	TMS38030.1		NS/NS		NS	NS	NS	NS		NS	NS	NS	NS		16.623	30.9847	17.3637	12.7441	28.6231	34.0689
TRINITY_DN6407_c0_g1_i1	TRINITY_DN6407_c0_g1_i1.g45049	Trypsin Inhibitor like cysteine rich domain	TKR89646.1		NS/NS		NS	NS	NS	NS		NS	NS	NS	NS		25.69	16.2301	15.1933	20.1782	16.1783	21.2931
TRINITY_DN6671_c0_g1_i1	TRINITY_DN6671_c0_g1_i1.g35149	hypothetical protein	TKR73549.1		NS/NS		NS	NS	NS	NS		NS	NS	NS	NS		45.3354	41.3129	32.557	31.8603	34.8456	37.1108
TRINITY_DN7280_c0_g4_i1	TRINITY_DN7280_c0_g4_i1.g51112	EGF domain	TKR68514.1		NS/NS		NS	NS	NS	NS		NS	NS	NS	NS		66.4919	76.7239	72.7107	97.7049	57.8685	65.7044
TRINITY_DN7280_c0_g5_i1	TRINITY_DN7280_c0_g5_i1.g51113	EGF domain	TKR68510.1		NS/NS		NS	NS	NS	NS		NS	NS	NS	NS		95.2043	69.3466	79.2221	76.4647	85.8694	83.3472
TRINITY_DN948_c0_g1_i2	TRINITY_DN948_c0_g1_i2.g33787	Copper/zinc superoxide dismutase (SODC)	TMS35286.1		NS/NS		NS	NS	NS	NS		NS	NS	NS	NS		99.7378	92.954	120.461	93.4568	82.7582	91.8645
TRINITY_DN16_c0_g1_i32	TRINITY_DN16_c0_g1_i32.g17965	Ubiquitin family	TKR67169.1		NS/U		0.362083	0.431616	0.0051	0.000809094		NS	NS	NS	NS		107.294	123.939	102.012	112.573	154.938	136.276
TRINITY_DN200_c0_g1_i15	TRINITY_DN200_c0_g1_i15.g48407	Actin	TMS37116.1		NS/U		0.892148	0.981737	5e-05	8.82e-24		NS	NS	NS	NS		169.252	175.58	164.956	121.069	308.632	327.305
TRINITY_DN200_c0_g1_i18	TRINITY_DN200_c0_g1_i18.g48404	Actin	TMS37116.1		NS/U		1.90086	1.97944	5e-05	1.79e-13		NS	NS	NS	NS		16.623	13.2791	9.76711	18.0542	57.2463	53.5369
TRINITY_DN200_c0_g1_i9	TRINITY_DN200_c0_g1_i9.g48408	Actin	TKR82581.1		NS/U		2.11883	2.20593	5e-05	5.42e-225		NS	NS	NS	NS		214.587	208.04	252.86	217.712	909.718	911.344
TRINITY_DN20158_c0_g1_i1	TRINITY_DN20158_c0_g1_i1.g13972	Trypsin	TKR73672.1		NS/U		1.06942	1.16045	5e-05	0		NS	NS	NS	NS		2114.14	2137.94	1979.47	2039.06	4374.36	4498.32
TRINITY_DN31335_c0_g1_i1	TRINITY_DN31335_c0_g1_i1.g20662	Saposin (B) Domains	TKR81466.1		NS/U		2.03134	2.10973	5e-05	8.19e-61		NS	NS	NS	NS		63.4695	61.9693	54.2617	49.9145	247.03	259.167
TRINITY_DN3283_c0_g1_i1	TRINITY_DN3283_c0_g1_i1.g50227	Actin	TKR75970.1		NS/U		1.65157	1.65135	5e-05	1.55e-15		NS	NS	NS	NS		27.2012	29.5092	39.0684	41.4184	87.1139	79.697
TRINITY_DN36956_c0_g1_i1	TRINITY_DN36956_c0_g1_i1.g42814	Saposin-like type B, region 1	TMS37588.1		NS/U		3.0504	3.10375	5e-05	2.49e-18		NS	NS	NS	NS		6.0445	5.90165	9.76687	6.37181	43.557	54.1453
TRINITY_DN4080_c0_g1_i2	TRINITY_DN4080_c0_g1_i2.g53143	Serine carboxypeptidase	TKR80512.1		NS/U		1.41871	1.49804	5e-05	2.77e-11		NS	NS	NS	NS		24.1789	26.5583	22.7899	27.6123	71.5579	62.6625
TRINITY_DN493_c1_g1_i2	TRINITY_DN493_c1_g1_i2.g21264	Low-density lipoprotein receptor domain class A	TKR67730.1		NS/U		0.354437	0.450359	0.0122	0.00106624		NS	NS	NS	NS		105.783	92.954	93.3301	84.9608	131.293	122.283
TRINITY_DN6699_c0_g1_i1	TRINITY_DN6699_c0_g1_i1.g35207	hypothetical protein	TKR81827.1		NS/U		0.505704	0.595882	5e-05	1.06e-08		NS	NS	NS	NS		169.252	162.301	145.421	130.627	248.275	219.623
TRINITY_DN838_c0_g1_i1	TRINITY_DN838_c0_g1_i1.g31824	Actin	TKR95001.1		NS/U		1.30296	1.3456	5e-05	2.83e-11		NS	NS	NS	NS		27.2012	45.7393	34.7275	35.0463	83.3805	90.0393
TRINITY_DN8851_c0_g2_i1	TRINITY_DN8851_c0_g2_i1.g42935	Eukaryotic aspartyl protease	TKR67750.1		NS/U		0.92935	1.01556	5e-05	1.9e-08		NS	NS	NS	NS		46.8466	47.2147	36.898	43.5424	87.1139	90.6477
TRINITY_DN19899_c0_g1_i1	TRINITY_DN19899_c0_g1_i1.g47402	Glycosyl hydrolases family 31	TKR69511.1		U/D		-1.01323	-0.918158	5e-05	4.78e-29		0.543744	0.537842	5e-05	9.42e-18		433.708	463.294	641.373	665.88	222.763	220.231
TRINITY_DN2973_c2_g1_i1	TRINITY_DN2973_c2_g1_i1.g52447	Zinc carboxypeptidase	TKR70054.1		U/D		-0.255823	-0.16531	5e-05	0.000548713		0.952484	0.946267	5e-05	3.84e-137		1020.05	1009.21	1976.21	1948.79	861.183	827.997
TRINITY_DN4568_c0_g1_i1	TRINITY_DN4568_c0_g1_i1.g40311	Peptidase family M13	TMS39545.1		U/D		-0.528461	-0.43088	5e-05	2.15e-12		0.297024	0.291438	5e-05	8.89e-08		769.19	799.699	933.301	994.041	563.129	523.202
TRINITY_DN15331_c0_g1_i1	TRINITY_DN15331_c0_g1_i1.g44136	hypothetical protein	TKR64906.1		U/NS		NS	NS	NS	NS		0.423371	0.416532	5e-05	7.09e-06		441.264	355.586	555.64	511.889	446.148	420.995
TRINITY_DN2052_c1_g2_i1	TRINITY_DN2052_c1_g2_i1.g5814	Serine carboxypeptidase	TMS33416.1		U/NS		NS	NS	NS	NS		2.38193	2.36722	5e-05	1.77e-24		19.6453	14.7546	85.7335	93.4568	19.9118	15.8177
TRINITY_DN21_c0_g1_i18	TRINITY_DN21_c0_g1_i18.g17263	Trypsin	TKR76203.1		U/NS		NS	NS	NS	NS		NS	1.42552	NS	7.56e-05		7.5559	11.8037	27.1309	25.4882	19.9118	20.6847
TRINITY_DN21_c0_g1_i60	TRINITY_DN21_c0_g1_i60.g17260	Trypsin	TKR76203.1		U/NS		NS	NS	NS	NS		0.806404	0.799928	5e-05	4.02e-10		95.2043	98.8558	173.637	165.674	107.026	128.367
TRINITY_DN25750_c0_g1_i1	TRINITY_DN25750_c0_g1_i1.g13192	Endoribonuclease XendoU	TKR81803.1		U/NS		NS	NS	NS	NS		1.13108	1.11808	0.0023	0.000999245		16.623	11.8037	29.3013	32.9223	14.3116	27.3768
TRINITY_DN3360_c0_g1_i1	TRINITY_DN3360_c0_g1_i1.g19982	Serine carboxypeptidase	TKR94728.1		U/NS		NS	NS	NS	NS		1.13598	1.12336	0.00215	0.000424896		13.6006	16.2301	34.7275	30.7983	16.8005	18.2512
TRINITY_DN3931_c0_g1_i1	TRINITY_DN3931_c0_g1_i1.g29045	Trypsin	ACO35738.1		U/NS		NS	NS	NS	NS		2.67288	2.63297	0.00365	1.18e-09		3.02236	5.90184	27.1309	29.7363	11.8226	10.9507
TRINITY_DN412_c0_g1_i1	TRINITY_DN412_c0_g1_i1.g21344	Snake toxin and toxin-like protein	TKR67113.1		U/NS		NS	NS	NS	NS		0.25378	0.245346	0.0004	0.000564752		386.862	392.472	454.713	472.594	403.835	366.241
TRINITY_DN5636_c2_g1_i1	TRINITY_DN5636_c2_g1_i1.g2483	Trypsin Inhibitor like cysteine rich domain	TKR89644.1		U/NS		NS	NS	NS	NS		0.498092	NS	0.00255	NS		69.5142	72.2975	110.694	89.2088	56.6241	62.6625
TRINITY_DN8407_c0_g1_i1	TRINITY_DN8407_c0_g1_i1.g22463	hypothetical protein	TMS32929.1		U/NS		NS	NS	NS	NS		0.784976	0.77582	0.00105	0.000605504		31.7348	32.4601	52.0912	58.4105	45.4237	41.9778
TRINITY_DN867_c0_g2_i1	TRINITY_DN867_c0_g2_i1.g31118	Trypsin	TKR57827.1		U/NS		NS	NS	NS	NS		2.9135	2.85598	0.00625	5.57e-08		4.53354	1.47546	29.3013	15.9301	1.86673	5.47537
TRINITY_DN9564_c0_g1_i1	TRINITY_DN9564_c0_g1_i1.g37246	hypothetical protein	TMS39453.1		U/NS		NS	NS	NS	NS		0.27496	NS	0.00325	NS		219.121	237.549	288.672	263.378	247.03	234.224
TRINITY_DN9921_c0_g1_i1	TRINITY_DN9921_c0_g1_i1.g9227	Peptidase family M28	TKR57376.1		U/NS		NS	NS	NS	NS		1.38513	1.36893	0.00185	0.000141892		9.06708	14.7546	26.0456	36.1083	10.5781	8.51723
TRINITY_DN16_c0_g1_i19	TRINITY_DN16_c0_g1_i19.g17972	Ubiquitin family	TKR67164.1		U/U		0.216872	0.287586	0.01515	0.00115791		0.364556	0.35662	5e-05	3.1e-05		243.3	268.534	321.229	336.657	291.832	291.411
TRINITY_DN21_c0_g1_i15	TRINITY_DN21_c0_g1_i15.g17249	Trypsin	TKR76204.1		U/U		0.816299	0.908127	0.00045	4.62e-05		1.66381	1.65451	5e-05	2.35e-17		30.2236	39.8374	97.6711	124.255	57.2463	65.7044
TRINITY_DN2235_c0_g1_i2	TRINITY_DN2235_c0_g1_i2.g23168	Monopolar spindle protein 2	TKR81469.1		U/U		1.38	1.42781	5e-05	2.99e-10		0.763005	NS	0.00485	NS		24.1789	26.5583	42.3241	43.5424	57.8685	69.963
TRINITY_DN2887_c0_g2_i1	TRINITY_DN2887_c0_g2_i1.g43361	Nematode fatty acid retinoid binding protein (Gp-FAR-1)	TKR67107.1		U/U		0.741811	0.81649	5e-05	3.92e-11		0.445753	0.437931	0.00085	0.000787994		98.2267	118.037	147.592	146.557	182.939	172.778
TRINITY_DN35_c0_g1_i4	TRINITY_DN35_c0_g1_i4.g18222	Trypsin Inhibitor like cysteine rich domain	TKR73364.1		U/U		0.745657	0.815189	0.0032	0.00069192		0.822977	0.812622	0.0013	0.000486801		33.2459	25.0828	49.9208	53.1005	48.5349	47.4532
TRINITY_DN36807_c0_g1_i1	TRINITY_DN36807_c0_g1_i1.g2118	Aspartic acid proteinase inhibitor	TKR61470.1		U/U		0.25308	0.330934	0.0003	4.68e-06		0.876915	0.869516	5e-05	1.38e-40		374.772	414.604	709.743	738.097	480.371	446.546
TRINITY_DN36915_c0_g1_i1	TRINITY_DN36915_c0_g1_i1.g20193	ChaC-like protein	TKR69494.1		U/U		0.216106	0.298057	0.0019	4.83e-05		0.672071	0.665068	5e-05	1.54e-22		426.153	389.521	671.76	626.586	486.594	449.588
TRINITY_DN391_c0_g1_i2	TRINITY_DN391_c0_g1_i2.g637	Saposin (B) Domains	TKR81470.1		U/U		1.29252	1.35102	0.0007	1.61e-05		1.69141	1.67458	5e-05	7e-09		10.5783	17.7055	42.3241	48.8524	36.0901	31.6354
TRINITY_DN514_c0_g2_i1	TRINITY_DN514_c0_g2_i1.g7867	hypothetical protein	TKR95435.1		U/U		1.12064	1.19667	0.01105	0.0030574		1.53194	1.51421	0.0009	5.01e-05		9.06708	11.8037	39.0684	21.2402	24.8897	20.0763
TRINITY_DN79_c0_g3_i2	TRINITY_DN79_c0_g3_i2.g17952	Chitinase class I	TKR81447.1		U/U		0.789428	0.87821	5e-05	1.8e-22		0.87951	0.872859	5e-05	6.46e-23		190.409	206.564	361.383	368.517	326.055	355.29
TRINITY_DN79_c0_g3_i3	TRINITY_DN79_c0_g3_i3.g17953	Chitinase class I	TKR81447.1		U/U		1.9552	2.04122	5e-05	1.35e-51		0.811259	0.803639	5e-05	1.43e-06		52.8913	63.4448	104.182	99.8289	217.163	230.574
TRINITY_DN802_c1_g2_i1	TRINITY_DN802_c1_g2_i1.g30960	Lipase (class 3)	TKR87344.1		U/U		1.398	1.47785	0.0003	4.26e-07		1.73581	1.72145	5e-05	2.06e-10		13.6006	17.7055	55.3469	48.8524	41.068	40.7611
